# Supplementary material
Source: publisher figshare collection journal article supplement (https://future-science-group.figshare.com/ndownloader/files/31484663)
Supplement: Supplementary file 1 [file 31484663]

# Real-world Ibrutinib dose reductions, holds, and discontinuations in chronic lymphocytic leukemia

Authors: Jing-Zhou Hou, Kellie Ryan, Senxi Du, Bruno Fang, Stanley Marks, Ray Page, Eileen Peng, Keith Szymanski, Sharon Winters, Hannah Le

Citation: doi/10.2217/FON-2021-0964

## Study design

### Patients with CLL

Received prior ibrutinib

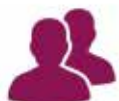

n = 180

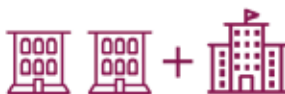

2 community networks  
and 1 academic practice

### Pooled de-identified data

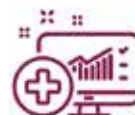

Multicenter, retrospective chart review

## Findings

### First-line (1L) (n = 56)

Median follow-up: 26 months

#### Dose reductions ( $\geq 1$ )

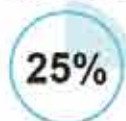

79% due to AEs

#### Discontinuations

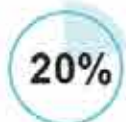

73% due to AEs

#### Dose holds

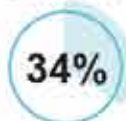

74% due to AEs

### Relapsed/refractory (R/R) (n = 124)

Median follow-up: 28.5 months

#### Dose reductions ( $\geq 1$ )

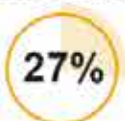

88% due to AEs

GI disorders, fatigue, and arthralgia/myalgia

#### Discontinuations

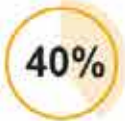

58% due to AEs

GI disorders, atrial fibrillation, and infections

#### Dose holds

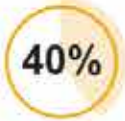

76% due to AEs

## Conclusion

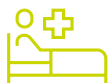

Dose reductions, holds, and discontinuations were frequent in patients with CLL receiving ibrutinib in routine clinical practice.

Glossary: 1L: First-line; AE: Adverse event; CLL: Chronic lymphocytic leukemia; GI: Gastrointestinal; R/R: Relapsed/refractory.
